# Supplementary material
Source: publisher figshare collection journal article supplement (https://diabetesjournals.figshare.com/ndownloader/files/29147874)
Supplement: Supplementary file 1 [file 29147874]

## Supplementary Tables

### Contents

|                                                                                                                                                                                                                                         |    |
|-----------------------------------------------------------------------------------------------------------------------------------------------------------------------------------------------------------------------------------------|----|
| Contents.....                                                                                                                                                                                                                           | 1  |
| Supplementary Table 1: Search strategy used in Embase .....                                                                                                                                                                             | 2  |
| Supplementary Table 2: Papers excluded on full-text.....                                                                                                                                                                                | 3  |
| Supplementary Table 3: Data collection questionnaire .....                                                                                                                                                                              | 5  |
| Supplementary Table 4: PROBAST data collection questionnaire.....                                                                                                                                                                       | 7  |
| Supplementary Table 5: Risk of bias assessment and applicability for model development studies .....                                                                                                                                    | 8  |
| Supplementary Table 6: Risk of bias assessment and applicability for external validation studies.....                                                                                                                                   | 9  |
| Supplementary Material 7: Example of AUC analysis .....                                                                                                                                                                                 | 11 |
| Model development studies.....                                                                                                                                                                                                          | 11 |
| Predicting success of metabolic surgery: age, body mass index, C-peptide, and duration score.<br>Lee et al 2013 (16).....                                                                                                               | 11 |
| A probability score for preoperative prediction of type 2 diabetes remission following RYGB<br>surgery. Still CD, Wood GC, Benotti P, Petrick AT, Gabrielsen J, Strodel WE, et al. Lancet<br>Diabetes Endocrinol. 2014 score (17) ..... | 11 |
| Prognostic factors and a new preliminary scoring system for remission of type 2 diabetes mellitus<br>after laparoscopic sleeve gastrectomy; Akira Umemura (39) .....                                                                    | 12 |
| Validation studies .....                                                                                                                                                                                                                | 13 |
| Preoperative Prediction of Type 2 Diabetes Remission After Gastric Bypass Surgery: a<br>Comparison of DiaRem Scores and ABCD Scores. Lee et al (48) .....                                                                               | 13 |
| Predictors of long-term diabetes remission after metabolic surgery; Lee MH et al (45) .....                                                                                                                                             | 14 |
| The Effect and Predictive Score of Gastric Bypass and Sleeve Gastrectomy on Type 2 Diabetes<br>Mellitus Patients with BMI <30 kg/m <sup>2</sup> (46) .....                                                                              | 15 |
| Metabolic Surgery for Diabetes Treatment: Sleeve Gastrectomy or Gastric Bypass World journal<br>of surgery. 2017;41(1):216-23. Lee W-J, Chong K, Aung L, Chen S-C, Ser K-H, Lee Y-C (49) 16                                             |    |
| Do Bariatric Surgery-Related Type 2 Diabetes Remission Predictors Add Clinical Value? A<br>Study on Asian Indian Obese Diabetics; Raj et al (53) .....                                                                                  | 17 |
| The Effects of Laparoscopic Sleeve Gastrectomy with Duodenojejunal Bypass on Japanese<br>Patients with BMI < 35 kg/m <sup>2</sup> on Type 2 Diabetes Mellitus and the Prediction of Successful<br>Glycemic Contro; Seki et al (54)..... | 18 |
| Predicting remission of diabetes post metabolic surgery: a comparison of ABCD, diarem, and<br>DRS scores; Ahuja et al (57) .....                                                                                                        | 18 |
| Laparoscopic gastric bypass for the treatment of type 2 diabetes: a comparison of Roux-en-Y<br>versus single anastomosis gastric bypass. 2018;14(4); Almalki et al (58) .....                                                           | 19 |
| References .....                                                                                                                                                                                                                        | 21 |

## Supplementary Table 1: Search strategy used in Embase

1. exp \*Diabetes Mellitus, Type 2/ or exp \*DIABETES MELLITUS/ or diabetes.mp.
2. exp \*REMISSION, SPONTANEOUS/ or exp \*REMISSION INDUCTION/ or remission.mp.
3. reversal.mp.
4. cure\*.mp.
5. resolv\*.mp.
6. treat\*.mp.
7. 2 or 3 or 4 or 5 or 6
8. bariatric.mp. or exp \*BARIATRICS/
9. gastric band\*.mp.
10. exp \*Gastric Bypass/ or roux en y.mp. or exp \*Anastomosis, Roux-en-Y/
11. gastrectomy.mp. or exp \*GASTRECTOMY/
12. exp \*Gastrectomy/ or sleeve gastrectomy.mp. or exp \*Gastroplasty/
13. exp \*Biliopancreatic Diversion/ or duodenal switch.mp.
14. metabolic surgery.mp. or exp \*Bariatric Surgery/
15. 8 or 9 or 10 or 11 or 12 or 13 or 14
16. (Stratification or ROC curve or discrimination or discriminate or c-statistic or c statistic or area or area under the curve or AUC or calibration or indices or algorithm\$.mp. or multivariable.ti,ab. [mp=title, abstract, heading word, drug trade name, original title, device manufacturer, drug manufacturer, device trade name, keyword, floating subheading word, candidate term word])
17. Validat\$.mp. or Predict\$.ti. or Rule\$.mp. or (Predict\$ and (Outcome\$ or Risk\$ or Model\$)).mp. or ((History or Variable\$ or Criteria or Scor\$ or Characteristic\$ or Finding\$ or Factor\$) and (Predict\$ or Model\$ or Decision\$ or Identif\$ or Prognos\$)).mp. or (Decision\$.mp. and ((Model\$ or Clinical\$).mp. or Logistic Models/)) or (Prognostic and (History or Variable\$ or Criteria or Scor\$ or Characteristic\$ or Finding\$ or Factor\$ or Model\$)).mp. [mp=title, abstract, heading word, drug trade name, original title, device manufacturer, drug manufacturer, device trade name, keyword, floating subheading word, candidate term word]
18. predict\*.mp.
19. exp \*Observer Variation/ or exp \*"Reproducibility of Results"/ or observ\*.mp.
20. exp \*Algorithms/ or validat\*.mp. or exp \*"Sensitivity and Specificity"/
21. ((prognos\* or predict\*) adj3 model).mp. [mp=title, abstract, heading word, drug trade name, original title, device manufacturer, drug manufacturer, device trade name, keyword, floating subheading word, candidate term word]
22. scor\*.mp.
23. exp \*ROC CURVE/ or ROC.mp.
24. AUC.mp. or exp \*Area Under Curve/
25. 16 or 17 or 18 or 19 or 20 or 21 or 22 or 23 or 24
26. 1 and 7 and 15 and 25
27. limit 26 to (english language and last 15 years)

Supplementary Table 2: Papers excluded on full-text

| Paper ID                                                                                                                                                                                                                                                                                                                   | Reasons for exclusion                                                                                                                      |
|----------------------------------------------------------------------------------------------------------------------------------------------------------------------------------------------------------------------------------------------------------------------------------------------------------------------------|--------------------------------------------------------------------------------------------------------------------------------------------|
| Bhasker (2018)<br>Bhasker AG, Dixon JB, Lakdawala M. Selection of Bypass vs Sleeve for the Management of Type-2 Diabetes in Severely Obese: Could Ethnicity Play a Role? Obesity surgery. 2018;28(10):3073-9                                                                                                               | No model development or validation. Used the prediction score as adjusting variable to choose the appropriate type of bariatric surgery    |
| Haruta (2017)<br>Haruta H, Kasama K, Ohta M, Sasaki A, Yamamoto H, Miyazaki Y, et al. Long-Term Outcomes of Bariatric and Metabolic Surgery in Japan: Results of a Multi-Institutional Survey. Obesity surgery. 2017;27(3):754-62                                                                                          | No model development or validation. Remission rate for type 2 diabetes mellitus at 3 years after surgery stratified by prediction model    |
| Wood (2016)<br>G. Craig Wood MTM, PhD2; Christopher D. Still, DO1; et al Annemarie G. Hirsch, PhD, MPH3. Association of DiaRem Score With Cure of Type 2 Diabetes Following Bariatric Surgery Author Affiliations. JAMA Surg. 2016(151(8):779-781. doi:10.1001/jamasurg.2016.0251).                                        | Population (P)-Used the same population as was used to develop the model                                                                   |
| Park J Y et al (2015)<br>Park Ji Y, Kim Yong J. Prediction of Diabetes Remission in Morbidly Obese Patients After Roux-en-Y Gastric Bypass. Obesity surgery. 2016;26(4):749-56.                                                                                                                                            | Outcome (O)- Definition of diabetes remission not fulfilled. Mean follow-up was 12.3±8.0 with IQR of 1.0 months to 41.3months              |
| Panunzi Simona (2016)<br>Panunzi S, Carlsson L, De Gaetano A, Peltonen M, Rice T, Sjostrom L, et al. Determinants of Diabetes Remission and Glycemic Control After Bariatric Surgery. Diabetes care. 2016;39(1):166-74LID.                                                                                                 | Outcome (O)- Definition of diabetes remission not fulfilled. Diabetes remission was defined without mention of HbA1c or follow up duration |
| Ha Jane et al (2019)<br>Ha J, Kwon Y, Kim Nam H, Park S, Menzo Emanuele L, Rosenthal Raul J. Discordance in prediction for prognosis of type 2 diabetes after metabolic surgery: comparison of the ABCD, DiaRem, and individualized metabolic surgery models. Annals of surgical treatment and research. 2019;97(6):309-18 | No model development or validation. Evaluated discordance between prediction models                                                        |
| Sjoholm K et al (2020)                                                                                                                                                                                                                                                                                                     | No model development or validation. Evaluated diabetes relapse rate                                                                        |

|                                                                                                                                                                                                                                                                                                                |                                                                                                                                       |
|----------------------------------------------------------------------------------------------------------------------------------------------------------------------------------------------------------------------------------------------------------------------------------------------------------------|---------------------------------------------------------------------------------------------------------------------------------------|
| Sjoholm K, Svensson PA, Taube M, Jacobson P, Andersson-Assarsson JC, Carlsson LMS, et al. Evaluation of Prediction Models for Type 2 Diabetes Relapse After Post-bariatric Surgery Remission: a Post hoc Analysis of 15-Year Follow-up Data from the Swedish Obese Subjects (SOS) Study. Obesity Surgery. 2020 |                                                                                                                                       |
| Sohal D S et al (2020)<br>Sohal DS, Nain PS, Singh P, Ahuja A, Singh A. ABCD score of > 6 predicts diabetes remission following bariatric surgery. International Journal of Diabetes in Developing Countries. 2020                                                                                             | Outcome (O)- Definition of diabetes remission not fulfilled. Follow up of period of 6 month                                           |
| Ceperuelo-Mallafre Victoria et al (2019)<br>Ceperuelo-Mallafre V, Llauro G, Keiran N, Benaiges E, Astiarraga B, Martinez L, et al. Preoperative Circulating Succinate Levels as a Biomarker for Diabetes Remission After Bariatric Surgery. Diabetes care. 2019;42(10):1956-65.                                | Outcome (O)- Definition of diabetes remission not fulfilled. Focussed on identifying single predictor, small number of outcomes (<30) |

Supplementary Table 3: Data collection questionnaire

|                         |                                                                                                                                                            |
|-------------------------|------------------------------------------------------------------------------------------------------------------------------------------------------------|
| Characteristic of study | Types of Study                                                                                                                                             |
|                         | Ref id                                                                                                                                                     |
|                         | Publication Reference                                                                                                                                      |
|                         | Aim/Objective                                                                                                                                              |
|                         | Number of participants?                                                                                                                                    |
|                         | Type of study                                                                                                                                              |
| Source                  | Source of data?                                                                                                                                            |
|                         | Country                                                                                                                                                    |
|                         | Centres -> Single/ multiple                                                                                                                                |
|                         | Study Date (start)                                                                                                                                         |
|                         | Study Date (end)                                                                                                                                           |
|                         | Number of outcome/events                                                                                                                                   |
|                         | Number of outcomes/events in relation to the number of candidate predictors (Events Per Variable)                                                          |
|                         | Number of participants with any missing value (include predictors and outcomes) -> Lost to follow up/ died/ no information                                 |
|                         | Handling of missing data -> Others                                                                                                                         |
| Participants            | Age Mean (SD)                                                                                                                                              |
|                         | Males                                                                                                                                                      |
|                         | Females                                                                                                                                                    |
|                         | Diabete Duration                                                                                                                                           |
|                         | Body mass index mean (SD)                                                                                                                                  |
|                         | HbA1c Mean (SD)                                                                                                                                            |
|                         | Inclusion Criteria                                                                                                                                         |
|                         | Exclusion Criteria                                                                                                                                         |
|                         | Types of Surgery -> Gastric Band/ Gastric bypass/ Sleeve gastrectomy/ duodenal switch                                                                      |
| Outcomes                | Definition for measurement of outcome                                                                                                                      |
|                         | Method for measurement of outcome                                                                                                                          |
|                         | Was the same outcome definition (and method for measurement) used in all patients?                                                                         |
|                         | Type of outcome                                                                                                                                            |
|                         | Was the outcome assessed without knowledge of the candidate predictors (i.e., blinded)?                                                                    |
|                         | Were candidate predictors part of the outcome (e.g., in panel or consensus diagnosis)?                                                                     |
|                         | Time of outcome occurrence or summary of duration of study - Follow-up                                                                                     |
|                         |                                                                                                                                                            |
| Predictors              | Number of variables                                                                                                                                        |
|                         | Types of variables (Number and type of predictors (e.g., demographics, patient history, physical examination, additional testing, disease characteristics) |
|                         | Definition for measurement of candidate predictors                                                                                                         |
|                         | Method for measurement of candidate predictors                                                                                                             |
|                         | Timing of predictor measurement -> Patient Presentation/ at diagnosis/ treatment initiation/ post operatively                                              |

|             |                                                                                                                                                                                                                                                                   |
|-------------|-------------------------------------------------------------------------------------------------------------------------------------------------------------------------------------------------------------------------------------------------------------------|
|             | Handling of predictors in the modelling -> Continuous/ linear/ categorised                                                                                                                                                                                        |
| Analysis    | Modelling method -> Logistic regression                                                                                                                                                                                                                           |
|             | Method for selection of predictors for inclusion in multivariable modelling (e.g., all candidate predictors, pre-selection based on unadjusted association with the outcome)                                                                                      |
|             | Method for selection of predictors during multivariable modelling (e.g., full model approach, backward or forward selection) and criteria used (e.g., p-value, Akaike Information Criterion)                                                                      |
|             | Shrinkage of predictor weights or regression coefficients (e.g., no shrinkage, uniform shrinkage, penalized estimation)                                                                                                                                           |
| Performance | Calibration (calibration plot, calibration slope, Hosmer-Lemeshow test) and Discrimination (C-statistic, D-statistic, log-rank) measures with confidence intervals                                                                                                |
|             | Classification measures (e.g., sensitivity, specificity, predictive values, net reclassification improvement) and whether a-priori cut points were used                                                                                                           |
|             | Method used for testing model performance: development dataset only (random split of data, resampling methods e.g. bootstrap or cross-validation, none) or separate external validation (e.g. temporal, geographical, different setting, different investigators) |
|             | In case of poor validation, whether model was adjusted or updated (e.g., intercept recalibrated, predictor effects adjusted, or new predictors added)                                                                                                             |
|             | Final and other multivariable models (e.g., basic, extended, simplified) presented, including predictor weights or regression coefficients, intercept, baseline survival, model performance measures (with standard errors or confidence intervals)               |
|             | Any alternative presentation of the final prediction models, e.g., sum score, nomogram, score chart, predictions for specific risk subgroups with performance                                                                                                     |
|             | Comparison of the distribution of predictors (including missing data) for development and validation datasets                                                                                                                                                     |
|             | Interpretation of presented models (confirmatory, i.e., model useful for practice versus exploratory, i.e., more research needed)                                                                                                                                 |
|             | Comparison with other studies, discussion of generalizability, strengths and limitations.                                                                                                                                                                         |

Supplementary Table 4: PROBAST data collection questionnaire

|              |                                                                                                                    |
|--------------|--------------------------------------------------------------------------------------------------------------------|
| Participants | Were appropriate data sources used, e.g. cohort, RCT or nested case-control study data?                            |
|              | Were all inclusions and exclusions of participants appropriate?                                                    |
| Predictors   | Were predictors defined and assessed in a similar way for all participants?                                        |
|              | Were predictor assessments made without knowledge of outcome data?                                                 |
|              | Are all predictors available at the time the model is intended to be used?                                         |
| Outcome      | Was the outcome determined appropriately?                                                                          |
|              | Was a pre-specified or standard outcome definition used?                                                           |
|              | Were predictors excluded from the outcome definition?                                                              |
|              | Was the outcome defined and determined in a similar way for all participants?                                      |
|              | Was the outcome determined without knowledge of predictor information?                                             |
|              | Was the time interval between predictor assessment and outcome determination appropriate?                          |
| Analysis     | Were there a reasonable number of participants with the outcome?                                                   |
|              | Were continuous and categorical predictors handled appropriately?                                                  |
|              | Were all enrolled participants included in the analysis?                                                           |
|              | Were participants with missing data handled appropriately?                                                         |
|              | Was selection of predictors based on univariable analysis avoided?                                                 |
|              | Were complexities in the data (e.g. censoring, competing risks, sampling of controls) accounted for appropriately? |
|              | Were relevant model performance measures evaluated appropriately?                                                  |
|              | Were model overfitting and optimism in model performance accounted for?                                            |
|              | Do predictors and their assigned weights in the final model correspond to the results from multivariable analysis? |

Supplementary Table 5: Risk of bias assessment and applicability for model development studies

|                                           | Risk of Bias     |            |         |          |         | Applicability    |            |         |         |
|-------------------------------------------|------------------|------------|---------|----------|---------|------------------|------------|---------|---------|
|                                           | Participant<br>s | Predictors | Outcome | Analysis | Overall | Participant<br>s | Predictors | Outcome | Overall |
| ABCD; Lee et al; 2013 (16)                | L                | L          | L       | H        | H       | L                | L          | L       | L       |
| DiaRem ;Still et al; 2014 (17)            | L                | L          | L       | L        | L       | L                | L          | L       | L       |
| Robert et.al; 2013 (31)                   | L                | L          | L       | H        | H       | L                | L          | L       | L       |
| DRS; Ugale S; 2014 (33)                   | L                | L          | L       | H        | H       | L                | L          | L       | L       |
| ADDiaRem; Aron-Wisnewsky et.al; 2017 (34) | L                | L          | L       | L        | L       | L                | L          | L       | L       |
| DiaBetter; Pucci et.al; 2017 (35)         | UC               | L          | L       | H        | H       | L                | L          | L       | L       |
| IMS; Aminian et.al; 2017 (18)             | L                | L          | L       | H        | H       | L                | L          | L       | L       |
| DiaRem 2; Still et al; 2018 (36)          | UC               | UC         | L       | H        | H       | L                | L          | L       | L       |
| Hayes et.al; 2011 (40)                    | UC               | L          | L       | H        | H       | L                | L          | L       | L       |
| Dixon el.al; 2013 (13)                    | L                | L          | L       | UC       | UC      | L                | L          | L       | L       |
| 5 models; Ana et al; 2014 (41)            | UC               | UC         | L       | H        | H       | L                | L          | L       | L       |
| Cotillard et al; 2015 (42)                | UC               | L          | L       | H        | H       | L                | L          | L       | L       |
| Stallard et al; 2016 (43)                 | UC               | L          | L       | H        | H       | L                | L          | L       | L       |
| 5y-DR, 2018 (37)                          | UC               | L          | L       | H        | H       | L                | L          | L       | L       |
| MDR, 2020 (38)                            | L                | L          | L       | H        | H       | L                | L          | L       | L       |
| Umemura, 2020 (39)                        | UC               | L          | L       | H        | H       | L                | L          | L       | L       |

L= low risk, UC = unclear, H = high risk



Supplementary Table 6: Risk of bias assessment and applicability for external validation studies

|                                    | Risk of Bias |            |         |          |         | Applicability |            |         |                       |
|------------------------------------|--------------|------------|---------|----------|---------|---------------|------------|---------|-----------------------|
|                                    | Participants | Predictors | Outcome | Analyses | Overall | Participants  | Predictors | Outcome | Overall Applicability |
| Lee et al 2015 (44)                | L            | L          | L       | UC       | UC      | L             | L          | L       | L                     |
| Lee MH et al 2015 (45)             | L            | L          | L       | H        | H       | L             | L          | L       | L                     |
| Lee et al 2015 (46)                | L            | L          | L       | UC       | UC      | L             | L          | L       | L                     |
| Sampaio-Neto Jose, et al 2015 (47) | UC           | L          | L       | UC       | UC      | L             | L          | L       | L                     |
| Lee et al 2016 (48)                | L            | L          | L       | UC       | UC      | L             | L          | L       | L                     |
| Lee et al 2017 (49)                | L            | L          | L       | UC       | UC      | L             | L          | L       | L                     |
| Mehaffey et al 2017 (50)           | UC           | L          | L       | H        | H       | L             | L          | L       | L                     |
| Honarmand K, et al 2017 (51)       | UC           | L          | L       | UC       | UC      | L             | L          | L       | L                     |
| Tharkan, 2017 (52)                 | UC           | L          | L       | UC       | UC      | L             | L          | L       | L                     |
| Raj et al, 2017 (53)               | L            | L          | L       | H        | H       | L             | L          | L       | L                     |
| Seki et al. 2018 (54)              | UC           | L          | L       | UC       | UC      | L             | L          | L       | L                     |
| Shen et al 2018 (55)               | L            | L          | L       | UC       | UC      | L             | L          | L       | L                     |
| Naitoh et al 2018 (56)             | UC           | L          | L       | UC       | UC      | L             | L          | L       | L                     |
| Ahuja et al 2018 (57)              | L            | L          | L       | UC       | UC      | L             | L          | L       | L                     |
| Almalki et al 2018 (58)            | L            | L          | L       | UC       | UC      | L             | L          | L       | L                     |
| Chen et al 2018 (59)               | L            | L          | L       | UC       | UC      | L             | L          | L       | L                     |
| Wood et al 2018 (60)               | L            | L          | L       | UC       | UC      | L             | L          | L       | L                     |
| Dicker et al 2019 (61)             | L            | L          | L       | UC       | UC      | L             | L          | L       | L                     |
| Kam et al, 2020 (62)               | UC           | L          | L       | UC       | UC      | L             | L          | L       | L                     |
| Park et al, 2020 (63)              | L            | L          | L       | UC       | UC      | L             | L          | L       | L                     |
| Lee et al, 2020 (64)               | L            | L          | L       | UC       | UC      | L             | L          | L       | L                     |
| Guerron et al, 2020 (65)           | L            | L          | L       | L        | L       | L             | L          | L       | L                     |

L= low risk, UC = unclear, H = high risk

## Supplementary Material 7: Example of AUC analysis

Model development studies

Predicting success of metabolic surgery: age, body mass index, C-peptide, and duration score.

Lee et al 2013 (16)

From table:

Table: pop = population achieving diabetes remission; disease: 0 = no diabetes remission, 1 = diabetes remission

| score | pop | disease |
|-------|-----|---------|
| 0     | 2   | 0       |
| 0     | 1   | 1       |
| 1     | 6   | 0       |
| 1     | 3   | 1       |
| 2     | 17  | 0       |
| 2     | 13  | 1       |
| 3     | 13  | 0       |
| 3     | 11  | 1       |
| 4     | 10  | 0       |
| 4     | 7   | 1       |
| 5     | 6   | 0       |
| 5     | 8   | 1       |
| 6     | 4   | 0       |
| 6     | 20  | 1       |
| 7     | 3   | 0       |
| 7     | 20  | 1       |
| 8     | 0   | 0       |
| 8     | 15  | 1       |
| 9     | 0   | 0       |
| 9     | 13  | 1       |
| 10    | 0   | 0       |
| 10    | 4   | 1       |

Analysis:

*roctab disease score [fweight= pop ]*

|     | ROC    | -Asymptotic Normal--           |
|-----|--------|--------------------------------|
| Obs | Area   | Std. Err. [95% Conf. Interval] |
| 176 | 0.7909 | 0.0329 0.72636 0.85539         |

A probability score for preoperative prediction of type 2 diabetes remission following RYGB surgery. Still CD, Wood GC, Benotti P, Petrick AT, Gabrielsen J, Strodel WE, et al.

Lancet Diabetes Endocrinol. 2014 score (17)

From table S6 DiaRem score:

Table: pop = population achieving diabetes remission; disease: 0 = no diabetes remission, 1 = diabetes remission

| scoring | class | pop | disease |
|---------|-------|-----|---------|
| 0-2     | 5     | 3   | 0       |
| 0-2     | 5     | 20  | 1       |
| 3- 7    | 4     | 27  | 0       |
| 3- 7    | 4     | 48  | 1       |
| 8- 12   | 3     | 42  | 0       |
| 8- 12   | 3     | 12  | 1       |
| 13- 17  | 2     | 133 | 0       |
| 13- 17  | 2     | 17  | 1       |
| 18- 22  | 1     | 52  | 0       |
| 18- 22  | 1     | 1   | 1       |

*roctab disease class [fweight=pop]*

|     | ROC    | -Asymptotic Normal-- |                      |         |
|-----|--------|----------------------|----------------------|---------|
| Obs | Area   | Std. Err.            | [95% Conf. Interval] |         |
| 355 | 0.8404 | 0.0231               | 0.79522              | 0.88560 |

Prognostic factors and a new preliminary scoring system for remission of type 2 diabetes mellitus after laparoscopic sleeve gastrectomy; Akira Umemura (39)

Table: pop = population achieving diabetes remission; disease: 0 = no diabetes remission, 1 = diabetes remission

| score range | score | disease | pop |
|-------------|-------|---------|-----|
| Poor        | 1     | 0       | 8   |
| Poor        | 1     | 1       | 7   |
| Moderate    | 2     | 0       | 3   |
| Moderate    | 2     | 1       | 5   |
| Good        | 3     | 0       | 0   |
| Good        | 3     | 1       | 26  |

*roctab disease score [fweight= pop ], graph summary*

|     | ROC    | -Asymptotic Normal-- |                      |         |
|-----|--------|----------------------|----------------------|---------|
| Obs | Area   | Std. Err.            | [95% Conf. Interval] |         |
| 49  | 0.8648 | 0.0456               | 0.77538              | 0.95428 |

## Validation studies

Preoperative Prediction of Type 2 Diabetes Remission After Gastric Bypass Surgery: a Comparison of DiaRem Scores and ABCD Scores. Lee et al (48)

### Validation of ABCD score

From Table 4:

Table: pop1 = population achieving diabetes remission defined as hba1c of 6.0%, pop2 = population achieving diabetes remission defined as hba1c of 6.5%, disease: 0 = no diabetes remission, 1 = diabetes remission

| score | pop1 | pop2 | disease |
|-------|------|------|---------|
| 0     | 2    | 1    | 0       |
| 0     | 0    | 1    | 1       |
| 1     | 13   | 11   | 0       |
| 1     | 1    | 3    | 1       |
| 2     | 25   | 20   | 0       |
| 2     | 3    | 8    | 1       |
| 3     | 25   | 19   | 0       |
| 3     | 16   | 22   | 1       |
| 4     | 25   | 17   | 0       |
| 4     | 17   | 25   | 1       |
| 5     | 10   | 4    | 0       |
| 5     | 19   | 25   | 1       |
| 6     | 10   | 3    | 0       |
| 6     | 23   | 30   | 1       |
| 7     | 4    | 3    | 0       |
| 7     | 23   | 24   | 1       |
| 8     | 1    | 0    | 0       |
| 8     | 16   | 17   | 1       |
| 9     | 0    | 0    | 0       |
| 9     | 11   | 11   | 1       |
| 10    | 0    | 0    | 0       |
| 10    | 1    | 1    | 1       |

*Complete remission roctab disease score [fweight= pop1 ]*

| ROC |        | -Asymptotic Normal-- |                      |         |
|-----|--------|----------------------|----------------------|---------|
| Obs | Area   | Std. Err.            | [95% Conf. Interval] |         |
| 245 | 0.8198 | 0.0258               | 0.76918              | 0.87048 |

*Partial remission. roctab disease score [fweight= pop2 ]*

| ROC |        | -Asymptotic Normal-- |                      |         |
|-----|--------|----------------------|----------------------|---------|
| Obs | Area   | Std. Err.            | [95% Conf. Interval] |         |
| 245 | 0.8176 | 0.0274               | 0.76389              | 0.87123 |

### Validating DiaRem score

Table: pop = population achieving diabetes remission defined as hbA1c of 6.5%; disease: 0 = no diabetes remission, 1 = diabetes remission

| score | score | pop | disease |
|-------|-------|-----|---------|
| 0-2   | 5     | 0   | 0       |
| 0-2   | 5     | 5   | 1       |
| 3-7   | 4     | 10  | 0       |
| 3-7   | 4     | 58  | 1       |
| 8-12  | 3     | 61  | 0       |
| 8-12  | 3     | 47  | 1       |
| 13-17 | 2     | 13  | 0       |
| 13-17 | 2     | 8   | 1       |
| 18-22 | 1     | 31  | 0       |
| 18-22 | 1     | 12  | 1       |

*Complete and partial remission. roctab disease score [fweight= pop]*

ROC -Asymptotic Normal--  
 Obs Area Std. Err. [95% Conf. Interval]  
 245 0.7319 0.0296 0.67393 0.78995

Predictors of long-term diabetes remission after metabolic surgery; Lee MH et al (45)

From Table 6:

Table: pop1 = CR = population achieving diabetes remission defined as hba1c of 6.0%; pop2 = PR = population achieving diabetes remission defined as hba1c of 6.5%; disease: 0 = no diabetes remission, 1 = diabetes remission

|       | CR   | PR   |         |
|-------|------|------|---------|
| score | pop1 | pop2 | disease |
| 1     | 4    | 3    | 0       |
| 1     | 0    | 1    | 1       |
| 2     | 1    | 1    | 0       |
| 2     | 0    | 0    | 1       |
| 3     | 7    | 5    | 0       |
| 3     | 1    | 3    | 1       |
| 4     | 9    | 6    | 0       |
| 4     | 4    | 7    | 1       |
| 5     | 10   | 5    | 0       |
| 5     | 5    | 10   | 1       |
| 6     | 3    | 2    | 0       |
| 6     | 11   | 12   | 1       |
| 7     | 12   | 3    | 0       |
| 7     | 16   | 25   | 1       |
| 8     | 6    | 2    | 0       |
| 8     | 18   | 22   | 1       |

|    |    |    |   |
|----|----|----|---|
| 9  | 5  | 3  | 0 |
| 9  | 25 | 27 | 1 |
| 10 | 3  | 3  | 0 |
| 10 | 17 | 17 | 1 |

*Complete remission. roctab disease score [fweight= pop1 ]*

|     | ROC    | -Asymptotic Normal-- |                      |         |
|-----|--------|----------------------|----------------------|---------|
| Obs | Area   | Std. Err.            | [95% Conf. Interval] |         |
| 157 | 0.7631 | 0.0398               | 0.68507              | 0.84105 |

*Partial remission disease score [fweight= pop2 ]*

|     | ROC    | -Asymptotic Normal-- |                      |         |
|-----|--------|----------------------|----------------------|---------|
| Obs | Area   | Std. Err.            | [95% Conf. Interval] |         |
| 157 | 0.7323 | 0.0572               | 0.62012              | 0.84445 |

The Effect and Predictive Score of Gastric Bypass and Sleeve Gastrectomy on Type 2 Diabetes Mellitus Patients with BMI <30 kg/m<sup>2</sup> (46)

From Table 6:

Table: pop1 = CR = population achieving diabetes remission defined as hba1c of 6.0%; pop2 = PR = population achieving diabetes remission defined as hba1c of 6.5%; disease: 0 = no diabetes remission, 1 = diabetes remission

|       | CR   | PR   |         |
|-------|------|------|---------|
| Score | pop1 | pop2 | disease |
| 0     | 3    | 2    | 0       |
| 0     | 0    | 1    | 1       |
| 1     | 12   | 9    | 0       |
| 1     | 0    | 3    | 1       |
| 2     | 19   | 14   | 0       |
| 2     | 2    | 7    | 1       |
| 3     | 12   | 8    | 0       |
| 3     | 5    | 9    | 1       |
| 4     | 9    | 6    | 0       |
| 4     | 4    | 7    | 1       |
| 5     | 3    | 2    | 0       |
| 5     | 5    | 6    | 1       |
| 6     | 2    | 0    | 0       |
| 6     | 3    | 5    | 1       |
| 7     | 0    | 0    | 0       |
| 7     | 1    | 1    | 1       |

*Complete remission roctab disease score [fweight= pop1 ]*

|     | ROC    |           | -Asymptotic Normal-- |         |
|-----|--------|-----------|----------------------|---------|
| Obs | Area   | Std. Err. | [95% Conf. Interval] |         |
| 80  | 0.8087 | 0.0509    | 0.70903              | 0.90847 |

*Partial remission. roctab disease score [fweight= pop2 ]*

|     | ROC    |           | -Asymptotic Normal-- |         |
|-----|--------|-----------|----------------------|---------|
| Obs | Area   | Std. Err. | [95% Conf. Interval] |         |
| 80  | 0.7164 | 0.0564    | 0.60575              | 0.82702 |

Metabolic Surgery for Diabetes Treatment: Sleeve Gastrectomy or Gastric Bypass World journal of surgery. 2017;41(1):216-23. Lee W-J, Chong K, Aung L, Chen S-C, Ser K-H, Lee Y-C (49)

From tables 6 and 7 of Lee et al (49):

Table: pop1 = population achieving diabetes remission in SG at 1 yr; pop2 = population achieving diabetes remission in gastric bypass at 1 year; pop3 = population achieving diabetes remission in SG at 5 years; pop4 = population achieving diabetes remission in gastric bypass at 5 years; disease: 0 = no diabetes remission, 1 = diabetes remission

|             |       |         | SG 1yr | GB 1yr | SG 5 yr | GB 5 yr |
|-------------|-------|---------|--------|--------|---------|---------|
| score range | score | disease | pop1   | pop2   | pop3    | pop4    |
| 2-0         | 1     | 0       | 5      | 57     | 3       | 15      |
| 2-0         | 1     | 1       | 0      | 9      | 0       | 3       |
| 4-3         | 2     | 0       | 12     | 70     | 9       | 22      |
| 4-3         | 2     | 1       | 4      | 61     | 0       | 6       |
| 6-5         | 3     | 0       | 16     | 27     | 10      | 5       |
| 6-5         | 3     | 1       | 16     | 84     | 0       | 17      |
| 8-7         | 4     | 0       | 13     | 5      | 0       | 4       |
| 8-7         | 4     | 1       | 26     | 79     | 9       | 22      |
| 10-9        | 5     | 0       | 2      | 1      | 0       | 0       |
| 10-9        | 5     | 1       | 15     | 67     | 3       | 15      |
|             |       |         | 109    | 460    | 34      | 109     |

*SG at 1 year, roctab disease score [fweight= pop1]*

|     | ROC    |           | -Asymptotic Normal-- |         |
|-----|--------|-----------|----------------------|---------|
| Obs | Area   | Std. Err. | [95% Conf. Interval] |         |
| 109 | 0.7432 | 0.0450    | 0.65501              | 0.83133 |

*RYGB at 1 year, roctab disease score [fweight= pop2]*

|     | ROC    |           | -Asymptotic Normal-- |         |
|-----|--------|-----------|----------------------|---------|
| Obs | Area   | Std. Err. | [95% Conf. Interval] |         |
| 460 | 0.8483 | 0.0171    | 0.81484              | 0.88185 |

*SG at 5 year, roctab disease score [fweight= pop3]*



|     | ROC    |           | -Asymptotic Normal-- |         |
|-----|--------|-----------|----------------------|---------|
| Obs | Area   | Std. Err. | [95% Conf. Interval] |         |
| 34  | 1.0000 | 0.0000    | 1.00000              | 1.00000 |

*RYGB at 5 year roctab disease score [fweight= pop4]*

|     | ROC    |           | -Asymptotic Normal-- |         |
|-----|--------|-----------|----------------------|---------|
| Obs | Area   | Std. Err. | [95% Conf. Interval] |         |
| 109 | 0.8654 | 0.0344    | 0.79796              | 0.93289 |

Do Bariatric Surgery-Related Type 2 Diabetes Remission Predictors Add Clinical Value? A Study on Asian Indian Obese Diabetics; Raj et al (53)

From table 6:

Table: pop1= total = population achieving diabetes remission irrespective of type of surgery; pop2 = PR = population achieving diabetes remission in SG; pop3 = PR = population achieving diabetes remission in RYGB; disease: 0 = no diabetes remission, 1 = diabetes remission

|             |       |         | total | SG   | RYGB |
|-------------|-------|---------|-------|------|------|
| score range | score | disease | pop1  | pop2 | pop3 |
| 1-5         | 1     | 0       | 5     | 3    | 2    |
| 1-5         | 1     | 1       | 15    | 6    | 9    |
| 6-7         | 2     | 0       | 5     | 4    | 1    |
| 6-7         | 2     | 1       | 22    | 18   | 4    |
| >7          | 3     | 0       | 0     | 0    | 0    |
| >7          | 3     | 1       | 6     | 4    | 2    |
|             |       |         | 53    | 35   | 18   |

*Total roctab disease score [fweight= pop1]*

|     | ROC    |           | -Asymptotic Normal-- |         |
|-----|--------|-----------|----------------------|---------|
| Obs | Area   | Std. Err. | [95% Conf. Interval] |         |
| 53  | 0.6105 | 0.0834    | 0.44693              | 0.77400 |

*SG roctab disease score [fweight= pop2]*

|     | ROC    |           | -Asymptotic Normal-- |         |
|-----|--------|-----------|----------------------|---------|
| Obs | Area   | Std. Err. | [95% Conf. Interval] |         |
| 35  | 0.6480 | 0.0987    | 0.45443              | 0.84149 |

*RYGB roctab disease score [fweight= pop3]*

|     | ROC    |           | -Asymptotic Normal-- |         |
|-----|--------|-----------|----------------------|---------|
| Obs | Area   | Std. Err. | [95% Conf. Interval] |         |
| 18  | 0.5556 | 0.1623    | 0.23751              | 0.87360 |

The Effects of Laparoscopic Sleeve Gastrectomy with Duodenojejunal Bypass on Japanese Patients with BMI < 35 kg/m<sup>2</sup> on Type 2 Diabetes Mellitus and the Prediction of Successful Glycemic Control; Seki et al (54)

From table 6:

Table: pop1 = CR = population achieving diabetes remission defined as hba1c of 6.0%; pop2 = PR = population achieving diabetes remission defined as hba1c of 6.5%; disease: 0 = no diabetes remission, 1 = diabetes remission

|       | CR   | PR   |         |
|-------|------|------|---------|
| score | pop1 | pop2 | disease |
| 1     | 6    | 5    | 0       |
| 1     | 0    | 1    | 1       |
| 2     | 16   | 13   | 0       |
| 2     | 0    | 3    | 1       |
| 3     | 15   | 9    | 0       |
| 3     | 6    | 12   | 1       |
| 4     | 4    | 3    | 0       |
| 4     | 5    | 6    | 1       |
| 5     | 3    | 2    | 0       |
| 5     | 6    | 7    | 1       |
| 6     | 1    | 1    | 0       |
| 6     | 1    | 1    | 1       |
| 7     | 0    | 0    | 0       |
| 7     | 2    | 2    | 1       |
|       | 65   | 65   |         |

*Complete remission, roctab disease score [fweight= pop1]*

| ROC |        | -Asymptotic Normal-- |                      |         |
|-----|--------|----------------------|----------------------|---------|
| Obs | Area   | Std. Err.            | [95% Conf. Interval] |         |
| 65  | 0.8461 | 0.0451               | 0.75767              | 0.93455 |

*Partial remission roctab disease score [fweight= pop2]*

| ROC |        | -Asymptotic Normal-- |                      |         |
|-----|--------|----------------------|----------------------|---------|
| Obs | Area   | Std. Err.            | [95% Conf. Interval] |         |
| 65  | 0.7514 | 0.0592               | 0.63544              | 0.86740 |

Predicting remission of diabetes post metabolic surgery: a comparison of ABCD, diarem, and DRS scores; Ahuja et al (57)

From table 3:

Score range1 = ABCD score, score range 2 = DiaRem score, score range 3 = DRS score

pop1 = CR = population achieving diabetes remission in ABCD scoring; pop2 = PR = population achieving diabetes remission defined as hba1c of 6.5%; disease: 0 = no diabetes remission, 1 = diabetes remission

| ABCD          |         |       |         | DiaRem        |         |       | DRS           |         |       |           |
|---------------|---------|-------|---------|---------------|---------|-------|---------------|---------|-------|-----------|
| score range 1 | score 1 | pop 1 | disease | score range 2 | score 2 | pop 2 | score range 3 | score 3 | pop 3 | disease 3 |
| 2-0           | 1       | 7     | 0       | 18-22         | 1       | 10    | severe        | 1       | 0     | 0         |
| 2-0           | 1       | 3     | 1       | 18-22         | 1       | 3     | severe        | 1       | 0     | 1         |
| 4-3           | 2       | 10    | 0       | 13-17         | 2       | 10    | Moderate      | 2       | 17    | 0         |
| 4-3           | 2       | 4     | 1       | 13-17         | 2       | 3     | Moderate      | 2       | 9     | 1         |
| 6-5           | 3       | 9     | 0       | 8-12          | 3       | 3     | Mild          | 3       | 12    | 0         |
| 6-5           | 3       | 29    | 1       | 8-12          | 3       | 10    | Mild          | 3       | 64    | 1         |
| 8-7           | 4       | 4     | 0       | 3-7           | 4       | 7     |               |         |       |           |
| 8-7           | 4       | 32    | 1       | 3-7           | 4       | 40    |               |         |       |           |
| 10-9          | 5       | 0     | 0       | 0-2           | 5       | 0     |               |         |       |           |
| 10-9          | 5       | 4     | 1       | 0-2           | 5       | 16    |               |         |       |           |

*ABCD roctab disease score1 [fweight= pop1]*

ROC -Asymptotic Normal--  
Obs Area Std. Err. [95% Conf. Interval]  
102 0.7861 0.0488 0.69048 0.88174

*DiaRem roctab disease score2 [fweight= pop2]*

ROC -Asymptotic Normal--  
Obs Area Std. Err. [95% Conf. Interval]  
102 0.8403 0.0415 0.75898 0.92158

*DRS roctab disease3 score3 [fweight= pop3]*

ROC -Asymptotic Normal--  
Obs Area Std. Err. [95% Conf. Interval]  
102 0.7315 0.0504 0.63266 0.83026

Laparoscopic gastric bypass for the treatment of type 2 diabetes: a comparison of Roux-en-Y versus single anastomosis gastric bypass. 2018;14(4); Almalki et al (58)

From table 7:

In RYGB

Table: pop = population achieving diabetes remission; disease: 0 = no diabetes remission, 1 = diabetes remission

| RYGB        |       |     |         | In RYGB with single anastomosis |       |     |
|-------------|-------|-----|---------|---------------------------------|-------|-----|
| score range | score | pop | disease | score range                     | score | pop |
| 2-0         | 1     | 28  | 0       | 2-0                             | 1     | 14  |
| 2-0         | 1     | 3   | 1       | 2-0                             | 1     | 5   |
| 4-3         | 2     | 28  | 0       | 4-3                             | 2     | 17  |
| 4-3         | 2     | 18  | 1       | 4-3                             | 2     | 30  |
| 6-5         | 3     | 10  | 0       | 6-5                             | 3     | 11  |
| 6-5         | 3     | 28  | 1       | 6-5                             | 3     | 46  |
| 8-7         | 4     | 4   | 0       | 8-7                             | 4     | 3   |
| 8-7         | 4     | 26  | 1       | 8-7                             | 4     | 70  |
| 10-9        | 5     | 0   | 0       | 10-9                            | 5     | 0   |
| 10-9        | 5     | 12  | 1       | 10-9                            | 5     | 53  |

*roctab disease score [fweight= pop]*

|     |        |           |                      |
|-----|--------|-----------|----------------------|
|     | ROC    |           | -Asymptotic Normal-- |
| Obs | Area   | Std. Err. | [95% Conf. Interval] |
| 157 | 0.8397 | 0.0301    | 0.78084 0.89864      |

*In RYGB with single anastomosis, roctab disease score [fweight= pop]*

|     |        |           |                      |
|-----|--------|-----------|----------------------|
|     | ROC    |           | -Asymptotic Normal-- |
| Obs | Area   | Std. Err. | [95% Conf. Interval] |
| 249 | 0.8517 | 0.0269    | 0.79903 0.90446      |

## References

1. Mingrone G, Panunzi S, De Gaetano A, Guidone C, Iaiconelli A, Leccesi L, et al. Bariatric surgery versus conventional medical therapy for type 2 diabetes. *The New England journal of medicine*. 2012;366(17):1577-85.
2. Schauer PR, Bhatt DL, Kirwan JP, Wolski K, Aminian A, Brethauer SA, et al. Bariatric Surgery versus Intensive Medical Therapy for Diabetes - 5-Year Outcomes. *N Engl J Med*. 2017;376(7):641-51.
3. P M, V C, P S, CW IR, AA T, R S. Changes in glycaemic control, blood pressure and lipids 5 years following laparoscopic adjustable gastric banding combined with medical care in patients with type 2 diabetes: a longitudinal analysis. *Clinical obesity*. 2018;8(3).
4. Avenell A, Robertson C, Skea Z, Jacobsen E, Boyers D, Cooper D, et al. Bariatric surgery, lifestyle interventions and orlistat for severe obesity: the REBALANCE mixed-methods systematic review and economic evaluation. 2018.
5. Singh P, Subramania A, Adderley N, Gokhale K, Singhal R, Bellary S, et al. Impact of Bariatric Surgery on Cardiovascular Outcomes and Mortality: A Population-Based Cohort Study. *The British journal of surgery*. 2020;107(4):432- 42.
6. Singh P, Adderley N, Subramanian A, Gokhale K, Singhal R, Toulis KA, et al. The Impact of Bariatric Surgery on Incident Microvascular Complications in Patients With Type 2 Diabetes: A Matched Controlled Population-Based Retrospective Cohort Study. *Diabetes Care* 2021. 2021;44 (1):116-24.
7. Brethauer SA, Aminian A, Romero-Talamas H, Batayyah E, Mackey J, Kennedy L, et al. Can diabetes be surgically cured? Long-term metabolic effects of bariatric surgery in obese patients with type 2 diabetes mellitus. *Annals of surgery*. 2013;258(4):628-36; discussion 36.
8. Schauer PR, Mingrone G, Ikramuddin S, Wolfe B. Clinical Outcomes of Metabolic Surgery: Efficacy of Glycemic Control, Weight Loss, and Remission of Diabetes. *Diabetes Care*. 2016;39(6):902-11.
9. Mingrone G, Guidone C, Iaiconelli A, Nanni G, Castagneto M, Panunzi S, et al. Bariatric-metabolic surgery versus conventional medical treatment in obese patients with type 2 diabetes: 5 Year follow-up of an open-label, single-centre, randomised controlled trial. *The Lancet*. 2015;386(9997):964-73.
10. F R, DM N, RH E, PR S, KG A, PZ Z, et al. Metabolic Surgery in the Treatment Algorithm for Type 2 Diabetes: A Joint Statement by International Diabetes Organizations. *Diabetes care*. 2016;39(6).
11. Mahmood F, Munasinghe A, MacAno C, Sharples A, Etumnu N, Katreddy V, et al. Factors predicting remission or improvement of type 2 diabetes after gastric bypass. 33rd American Society for Metabolic Surgery Annual Meeting, ASMBS 2016 United States. 2016;12(7 Supplement 1):S165-S6.
12. Panunzi S, Carlsson L, De Gaetano A, Peltonen M, Rice T, Sjostrom L, et al. Determinants of Diabetes Remission and Glycemic Control After Bariatric Surgery. *Diabetes care*. 2016;39(1):166-74LID.
13. Dixon JB, Chuang LM, Chong K, Chen SC, Lambert GW, Straznicki NE, et al. Predicting the glycemic response to gastric bypass surgery in patients with type 2 diabetes. *Diabetes care*. 2013;36(1):20-6LID.
14. Blackstone R, Bunt JC, Cortes MC, Sugerman HJ. Type 2 diabetes after gastric bypass: remission in five models using HbA1c, fasting blood glucose, and medication status. *Surgery for obesity and related diseases : official journal of the American Society for Bariatric Surgery*. 2012;8(5):548-55LID.
15. Park JY. Prediction of Diabetes Remission after Bariatric or Metabolic Surgery. 2018.
16. Lee W-J, Hur Kyung Y, Lakadawala M, Kasama K, Wong Simon KH, Chen S-C, et al. Predicting success of metabolic surgery: age, body mass index, C-peptide, and duration score. *Surgery for obesity and related diseases : official journal of the American Society for Bariatric Surgery*. 2013;9(3):379-84.
17. Still CD, Wood GC, Benotti P, Petrick AT, Gabrielsen J, Strodel WE, et al. A probability score for preoperative prediction of type 2 diabetes remission following RYGB surgery. *Lancet Diabetes Endocrinol*. 2014;2(1):38-45.
18. Aminian A, Brethauer SA, Andalib A, Nowacki AS, Jimenez A, Corcelles R, et al. Individualized Metabolic Surgery Score: Procedure Selection Based on Diabetes Severity. *Annals of surgery*. 2017;266(4):650-7LID.
19. Moher D, Liberati A, Tetzlaff J, Altman DG. Preferred reporting items for systematic reviews and meta-analyses: the PRISMA statement. 2009.
20. Geersing GJ, Bouwmeester W, Zuithoff P, Spijker R, Leeflang M, Moons KG. Search filters for finding prognostic and diagnostic prediction studies in Medline to enhance systematic reviews. *PLoS One*. 2012;7(2):e32844.
21. EPPI-Reviewer 4: systematic review software 2017 [Available from: <http://eppi.ioe.ac.uk/cms/Default.aspx?alias=eppi.ioe.ac.uk/cms/er4>.
22. DistillerSR. DistillerSR 2020 [Available from: <https://www.evidencepartners.com/products/distillersr-systematic-review-software/>].

23. Karel G. M. Moons JAHDG, Walter Bouwmeester, Yvonne Vergouwe,. Critical Appraisal and Data Extraction for Systematic Reviews of Prediction Modelling Studies: The CHARMS Checklist. 2014 October.
24. Wolff RF, Kleijnen Systematic Reviews Y, United Kingdom (R.F.W., M.W.), Moons KGM, Julius Center for Health Sciences and Primary Care and Cochrane Netherlands UMCU, Utrecht University, Utrecht, the Netherlands (K.G.M., J.B.R.), Riley RD, Centre for Prognosis Research RIFCaHS, Keele University, Keele, United Kingdom (R.D.R.), et al. PROBAST: A Tool to Assess the Risk of Bias and Applicability of Prediction Model Studies. *Annals of Internal Medicine*. 2019;170(1):51-8.
25. Moons KG, Altman DG, Vergouwe Y, Royston P. Prognosis and prognostic research: application and impact of prognostic models in clinical practice. *BMJ (Clinical research ed)*. 2009;338:b606.
26. Moons KG, Kengne AP, Woodward M, Royston P, Vergouwe Y, Altman DG, et al. Risk prediction models: I. Development, internal validation, and assessing the incremental value of a new (bio)marker. *Heart*. 2012;98(9):683-90.
27. Steyerberg EW, Vickers AJ, Cook NR, Gerds T, Gonen M, Obuchowski N, et al. Assessing the performance of prediction models: a framework for some traditional and novel measures. *Epidemiology*. 2010;21(1):128-38.
28. Mandrekar JN. Receiver operating characteristic curve in diagnostic test assessment. *J Thorac Oncol*. 2010;5(9):1315-6.
29. Zhang R, Borisenko O, Telegina I, Hargreaves J, Ahmed AR, Sanchez Santos R, et al. Systematic review of risk prediction models for diabetes after bariatric surgery. *The British journal of surgery*. 2016;103(11):1420-7.
30. Hanson RK. Assessing the Calibration of Actuarial Risk Scales: A Primer on the E/O Index. <http://dxdoiorg/101177/0093854816683956>. 2016.
31. Robert M, Ferrand-Gaillard C, Disse E, Espalieu P, Simon C, Laville M, et al. Predictive factors of type 2 diabetes remission 1 year after bariatric surgery: impact of surgical techniques. *Obes Surg*. 2013;23(6):770-5.
32. Still Christopher D, Wood GC, Benotti P, Petrick Anthony T, Gabrielsen J, Strodel William E, et al. Preoperative prediction of type 2 diabetes remission after Roux-en-Y gastric bypass surgery: a retrospective cohort study. *The lancet Diabetes & endocrinology*. 2014;2(1):38-45.
33. Ugale S, Gupta N, Modi KD, Kota SK, Satwalekar V, Naik V, et al. Prediction of remission after metabolic surgery using a novel scoring system in type 2 diabetes – a retrospective cohort study. *Journal of Diabetes & Metabolic Disorders*. 2014;13(1):89.
34. Aron-Wisnewsky J, Sokolovska N, Liu Y, Comaneshter DS, Vinker S, Pecht T, et al. The advanced-DiaRem score improves prediction of diabetes remission 1 year post-Roux-en-Y gastric bypass. *Diabetologia*. 2017;60(10):1892-902.
35. Pucci A, Tymoszek U, Cheung WH, Makaronidis JM, Scholes S, Tharakan G, et al. Type 2 diabetes remission 2 years post Roux-en-Y gastric bypass and sleeve gastrectomy: The role of the weight loss and comparison of DiaRem and DiaBetter scores. *Diabetic Medicine*. 2017.
36. CD S, P B, T M, A C, GC W. DiaRem2: Incorporating Duration of Diabetes to Improve Prediction of Diabetes Remission After Metabolic Surgery. *Surgery for obesity and related diseases : official journal of the American Society for Bariatric Surgery*. 2019;15(5).
37. Debedat J, Sokolovska N, Coupaye M, Panunzi S, Chakaroun R, Genser L, et al. Long-term Relapse of Type 2 Diabetes After Roux-en-Y Gastric Bypass: Prediction and Clinical Relevance. *Diabetes Care*. 2018;41(10):2086-95.
38. Moh Mei C, Cheng A, Tan Chun H, Lim Boon K, Tan Bo C, Ng D, et al. Metabolic Surgery Diabetes Remission (MDR) Score: a New Preoperative Scoring System for Predicting Type 2 Diabetes Remission at 1 Year After Metabolic Surgery in the Singapore Multi-ethnic Asian Setting. *Obesity surgery*. 2020;30(9):3387-93.
39. Umemura A, Sasaki A, Nitta H, Nikai H, Baba S, Takahara T, et al. Prognostic factors and a new preliminary scoring system for remission of type 2 diabetes mellitus after laparoscopic sleeve gastrectomy. *Surgery Today*. 2020.
40. Hayes MT, Hunt LA, Foo J, Tychinskaya Y, Stubbs RS. A model for predicting the resolution of type 2 diabetes in severely obese subjects following Roux-en Y gastric bypass surgery. *Obes Surg*. 2011;21(7):910-6.
41. Ramos-Levi AM, Matia P, Cabrerizo L, Barabash A, Sanchez-Pernaute A, Calle-Pascual AL, et al. Statistical models to predict type 2 diabetes remission after bariatric surgery. *Journal of diabetes*. 2014;6(5):472-7LID.
42. Cotillard A, Poitou C, Duchateau-Nguyen G, Aron-Wisnewsky J, Bouillot JL, Schindler T, et al. Type 2 Diabetes Remission After Gastric Bypass: What Is the Best Prediction Tool for Clinicians? *Obesity surgery*. 2015;25(7):1128-32LID.
43. Stallard R, Sahai V, Drover JW, Chun S, Keresztes C. Defining and Using Preoperative Predictors of Diabetic Remission Following Bariatric Surgery. *JPEN J Parenter Enteral Nutr*. 2016;42(3):573-80.

44. Lee W-J, Almulaifi A, Tsou JJ, Ser K-H, Lee Y-C, Chen S-C. Laparoscopic sleeve gastrectomy for type 2 diabetes mellitus: predicting the success by ABCD score. *Surgery for obesity and related diseases : official journal of the American Society for Bariatric Surgery*. 2015;11(5):991-6.
45. Lee MH, Lee W-J, Chong K, Chen J-C, Ser K-H, Lee Y-C, et al. Predictors of long-term diabetes remission after metabolic surgery. *Journal of gastrointestinal surgery : official journal of the Society for Surgery of the Alimentary Tract*. 2015;19(6):1015-21.
46. Lee W-J, Almulaifi A, Chong K, Chen S-C, Tsou JJ, Ser K-H, et al. The Effect and Predictive Score of Gastric Bypass and Sleeve Gastrectomy on Type 2 Diabetes Mellitus Patients with BMI<30 kg/m(2). *Obesity surgery*. 2015;25(10):1772-8.
47. Sampaio-Neto J, Nassif LS, Branco-Filho AJ, Bolfarini LA, Loro LS, de SM, et al. EXTERNAL VALIDATION OF THE DIAREM SCORE AS REMISSION PREDICTOR OF DIABETES MELLITUS TYPE 2 IN OBESE PATIENTS UNDERGOING ROUX-EN-Y GASTRIC BYPASS. *Arq Bras Cir Dig*. 2015;28(Suppl 1):19-22.
48. Lee W-J, Chong K, Chen S-C, Zachariah J, Ser K-H, Lee Y-C, et al. Preoperative Prediction of Type 2 Diabetes Remission After Gastric Bypass Surgery: a Comparison of DiaRem Scores and ABCD Scores. *Obesity surgery*. 2016;26(10):2418-24.
49. Lee W-J, Chong K, Aung L, Chen S-C, Ser K-H, Lee Y-C. Metabolic Surgery for Diabetes Treatment: Sleeve Gastrectomy or Gastric Bypass? *World journal of surgery*. 2017;41(1):216-23.
50. Mehaffey JH, Mullen MG, Mehaffey RL, Turrentine FE, Malin SK, Kirby JL, et al. Type 2 diabetes remission following gastric bypass: does diarem stand the test of time? *Surgical endoscopy*. 2017;31(2):538-42LID.
51. Honarmand K, Chetty K, Vanniyasingam T, Anvari M, Chetty VT. Type 2 diabetes remission rates 1-year post-Roux-en-Y gastric bypass and validation of the DiaRem score: the Ontario Bariatric Network experience. *Clinical obesity*. 2017;7(3):176-82LID.
52. Tharakan G, Scott R, Szepietowski O, Miras AD, Blakemore AI, Purkayastha S, et al. Limitations of the DiaRem Score in Predicting Remission of Diabetes Following Roux-En-Y Gastric Bypass (RYGB) in an ethnically Diverse Population from a Single Institution in the UK. *Obesity surgery*. 2017;27(3):782-6LID.
53. Praveen Raj P, Bhattacharya S, Saravana Kumar S, Sabnis SC, Parthasarathi R, Swamy PDK, et al. Do Bariatric Surgery-Related Type 2 Diabetes Remission Predictors Add Clinical Value? A Study on Asian Indian Obese Diabetics. *Obesity surgery*. 2017;27(8):2113-9LID.
54. Seki Y, Kasama K, Yasuda K, Yokoyama R, Porciuncula JP, Kurokawa Y. The Effects of Laparoscopic Sleeve Gastrectomy with Duodenojejunal Bypass on Japanese Patients with BMI < 35 kg/m2 on Type 2 Diabetes Mellitus and the Prediction of Successful Glycemic Control. *Obesity surgery*. 2018;28(8):2429-38.
55. Shen SC, Wang W, Tam KW, Chen HA, Lin YK, Wang SY, et al. Validating Risk Prediction Models of Diabetes Remission After Sleeve Gastrectomy. *Obes Surg*. 2018.
56. Naitoh T, Kasama K, Seki Y, Ohta M, Oshiro T, Sasaki A, et al. Efficacy of Sleeve Gastrectomy with Duodenal-Jejunal Bypass for the Treatment of Obese Severe Diabetes Patients in Japan: a Retrospective Multicenter Study. *Obesity Surgery*. 2018;28(2):497-505.
57. Ahuja A, Tania O, Chaudhuri T, Khanna S, Seetharamaiah S, Majumdar K, et al. Predicting remission of diabetes post metabolic surgery: a comparison of ABCD, diarem, and DRS scores. *Obesity Surgery*. 2018:1-7.
58. Almalki OM, Lee W-J, Chong K, Ser K-H, Lee Y-C, Chen S-C. Laparoscopic gastric bypass for the treatment of type 2 diabetes: a comparison of Roux-en-Y versus single anastomosis gastric bypass. *Surgery for obesity and related diseases : official journal of the American Society for Bariatric Surgery*. 2018;14(4):509-15.
59. Chen J-C, Hsu N-Y, Lee W-J, Chen S-C, Ser K-H, Lee Y-C. Prediction of type 2 diabetes remission after metabolic surgery: a comparison of the individualized metabolic surgery score and the ABCD score. *Surgery for obesity and related diseases : official journal of the American Society for Bariatric Surgery*. 2018;14(5):640-5.
60. Craig Wood G, Horwitz D, Still CD, Mirshahi T, Benotti P, Parikh M, et al. Performance of the DiaRem Score for Predicting Diabetes Remission in Two Health Systems Following Bariatric Surgery Procedures in Hispanic and non-Hispanic White Patients. *Obesity Surgery*. 2018;28(1):61-8.
61. Dicker D, Golan R, Aron-Wisnewsky J, Zucker JD, Sokolowska N, Comaneshter DS, et al. Prediction of Long-Term Diabetes Remission After RYGB, Sleeve Gastrectomy, and Adjustable Gastric Banding Using DiaRem and Advanced-DiaRem Scores. *Obes Surg*. 2019;29(3):796-804.
62. Kam H, Tu Y, Pan J, Han J, Zhang P, Bao Y, et al. Comparison of Four Risk Prediction Models for Diabetes Remission after Roux-en-Y Gastric Bypass Surgery in Obese Chinese Patients with Type 2 Diabetes Mellitus. *Obesity surgery*. 2020;30(6):2147-57.

63. Park DG CY, Kim SH, Kim YJ. Diabetes Remission Rate after Sleeve Gastrectomy or Roux-en-Y Gastric Bypass; Utilizing Individualized Metabolic Surgery Score for Korean Patients. *J Metab Bariatr Surg*. 2020;9:13-8.
64. Lee MH, Almalki OM, Lee WJ, Chen SC, Chen JC, Wu CC. Laparoscopic Sleeve Gastrectomy for Type 2 Diabetes Mellitus: Long-Term Result and Recurrence of Diabetes. *Obesity Surgery*. 2020.
65. Gueron AD, Perez JE, Risoli T, Lee HJ, Portenier D, Corsino L. Performance and improvement of the DiaRem score in diabetes remission prediction: a study with diverse procedure types. *Surgery for Obesity and Related Diseases*. 2020.
66. Mehaffey JH, Mullen MG, Mehaffey RL, Turrentine FE, Malin SK, Schirmer B, et al. Diabetes remission following gastric bypass: Does diarem stand the test of time? 2016 Scientific Session of the Society of American Gastrointestinal and Endoscopic Surgeons, SAGES 2016 Boston, MA United States. 2016;30(SUPPL. 1):S461.
67. S F, P R, K C, A D, E R, A F. Top ten research priorities for type 2 diabetes: results from the Diabetes UK-James Lind Alliance Priority Setting Partnership. *The lancet Diabetes & endocrinology*. 2017;5(12).
68. A J, I N, J O, E S, E N, E S. Duration of type 2 diabetes and remission rates after bariatric surgery in Sweden 2007-2015: A registry-based cohort study. *PLoS medicine*. 2019;16(11).
69. Sjostrom L, Peltonen M, Jacobson P, Ahlin S, Andersson-Assarsson J, Anveden A, et al. Association of bariatric surgery with long-term remission of type 2 diabetes and with microvascular and macrovascular complications. *JAMA*. 2014;311(22):2297-304LID.
70. Arterburn DE, Bogart A, Sherwood NE, Sidney S, Coleman KJ, Haneuse S, et al. A multisite study of long-term remission and relapse of type 2 diabetes mellitus following gastric bypass. *Obesity surgery*. 2013;23(1):93-102LID.
71. Dogan K, Gadiot RP, Aarts EO, Betzel B, van Laarhoven CJ, Biter LU, et al. Effectiveness and Safety of Sleeve Gastrectomy, Gastric Bypass, and Adjustable Gastric Banding in Morbidly Obese Patients: a Multicenter, Retrospective, Matched Cohort Study. *Obes Surg*. 2015;25(7):1110-8.
72. L D, Y F, H L, Y Z, D Q, S T, et al. Comparative Effectiveness of Bariatric Surgeries in Patients With Obesity and Type 2 Diabetes Mellitus: A Network Meta-Analysis of Randomized Controlled Trials. *Obesity reviews : an official journal of the International Association for the Study of Obesity*. 2020.
73. Leighton E, Sainsbury CA, Jones GC. A Practical Review of C-Peptide Testing in Diabetes. *Diabetes Ther*. 82017. p. 475-87.
74. M P, RR R, T L, SE S, FJ S, DR M, et al. Resistance to Insulin Therapy Among Patients and Providers: Results of the Cross-National Diabetes Attitudes, Wishes, and Needs (DAWN) Study. *Diabetes care*. 2005;28(11).
